# Supplementary material for: Stereoisomers of an azine-linked donor–acceptor conjugated polymer: the impact of molecular conformation on electrical performance
Source: Royal Society of Chemistry journal article supplement (doi:10.1039/c6ra07389a), 2016-01-01
Supplement: c6ra07389a1.pdf [file c6ra07389a1.pdf]

**Supporting Information for**

**Stereoisomers of an azine-linked donor-acceptor conjugated  
polymer: the impact of molecular conformation on electrical  
performance**

Mithrabinda K Poduval,<sup>a,b#</sup> Iratxe Arrechea-Marcos,<sup>c#</sup> M. Carmen Ruiz Delgado,<sup>c</sup> Taiho Park,<sup>b</sup>

J. Teodomiro López Navarrete,<sup>c\*</sup> Rocío Ponce Ortiz<sup>c\*</sup> and Tae-Hyun Kim<sup>a\*</sup>

<sup>a</sup>Organic Material Synthesis Laboratory, Department of Chemistry, Incheon National University, Songdo-dong 12-1,  
Yeonsu-gu, Incheon 406-840, Korea

<sup>b</sup>Department of Chemical Engineering, Pohang University of Science and Technology, San31, Nam-gu, Pohang,  
Kyoungbuk, 790-780, Korea

<sup>c</sup>Department of Physical Chemistry, University of Malaga, 29071 Malaga, Spain

<sup>#</sup>These authors contributed equally to this work.

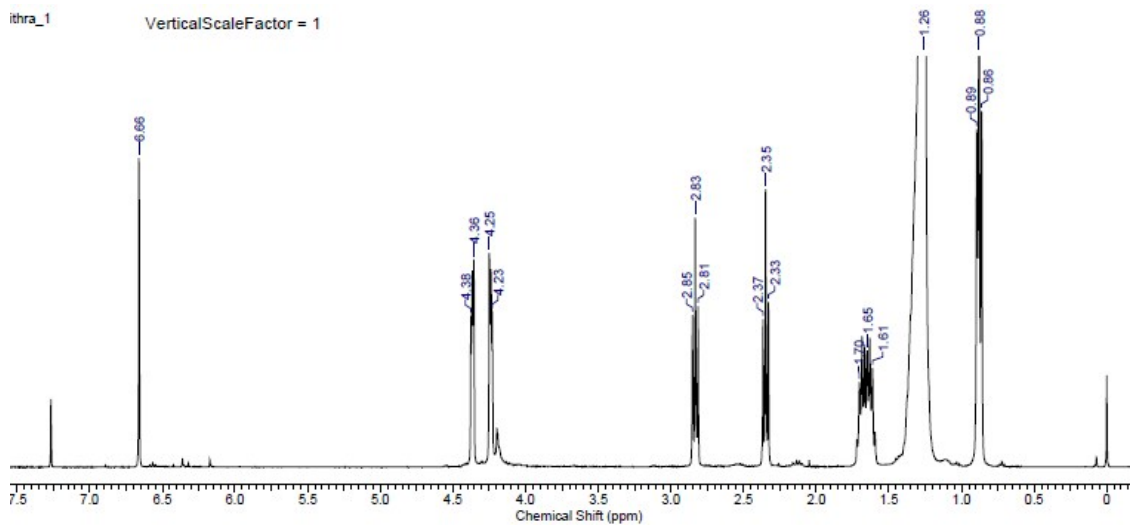

**Figure S1.**  $^1\text{H}$  NMR spectrum of compound **1**

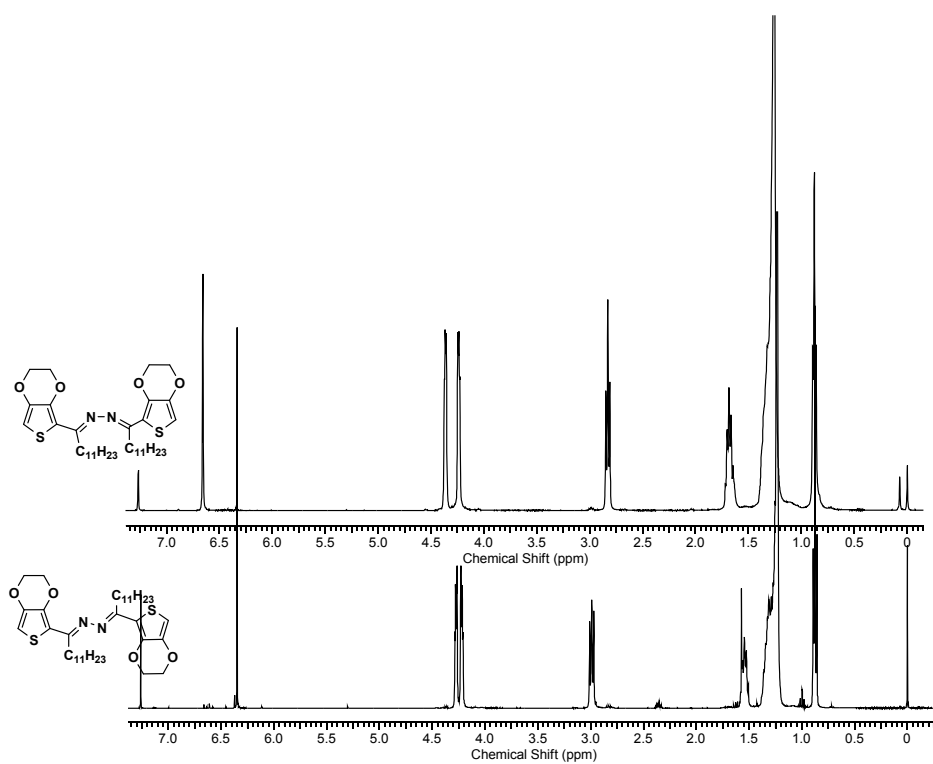

**Figure S2.**  $^1\text{H}$  NMR spectra of the azine molecule **2a**(lower) and **2b** (upper)

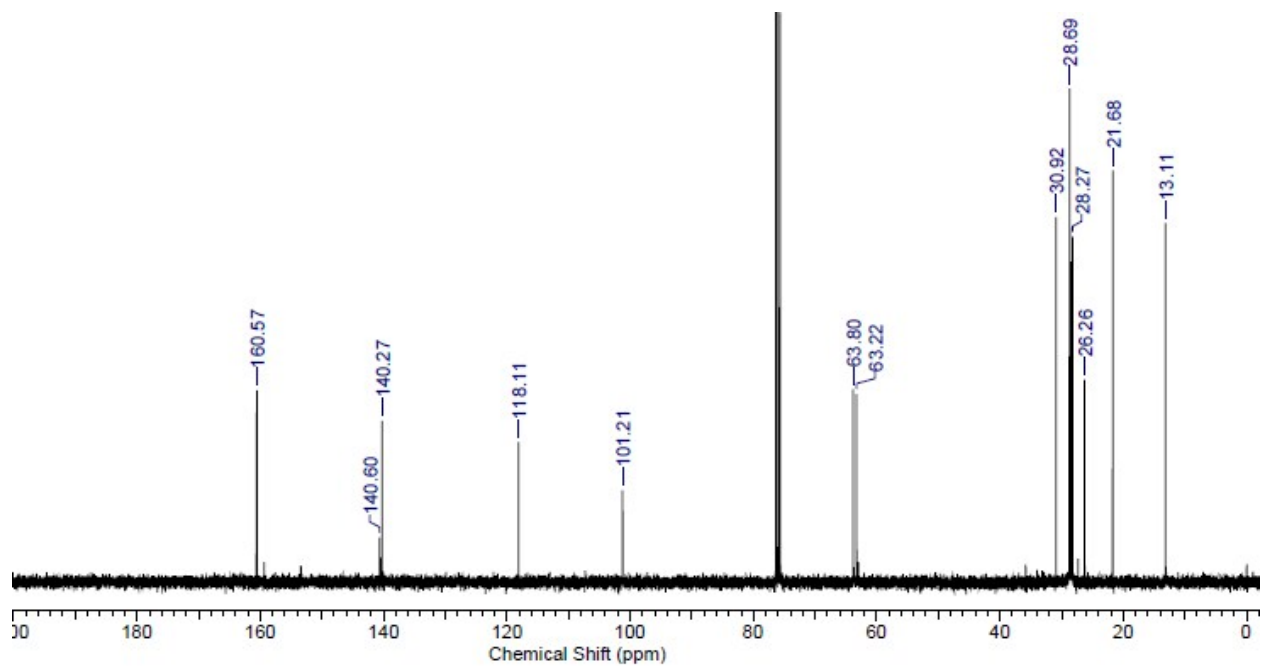

Figure S3.  $^{13}\text{C}$  NMR spectrum of the azine molecule **2a**

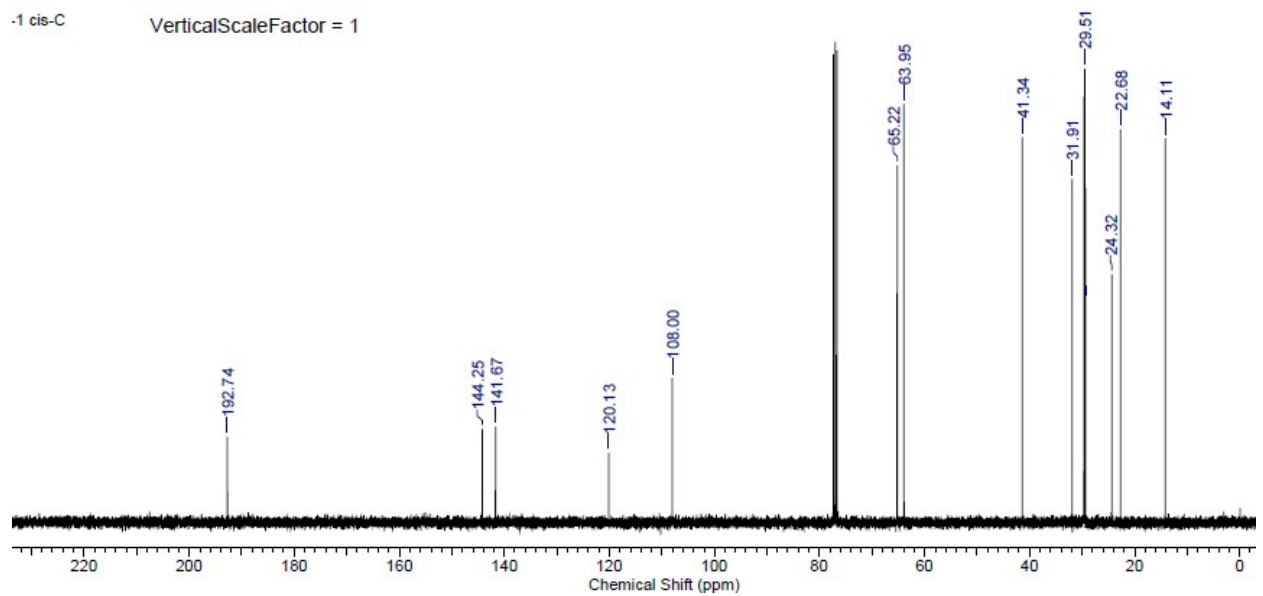

Figure S4.  $^{13}\text{C}$  NMR spectrum of the azine molecule **2b**

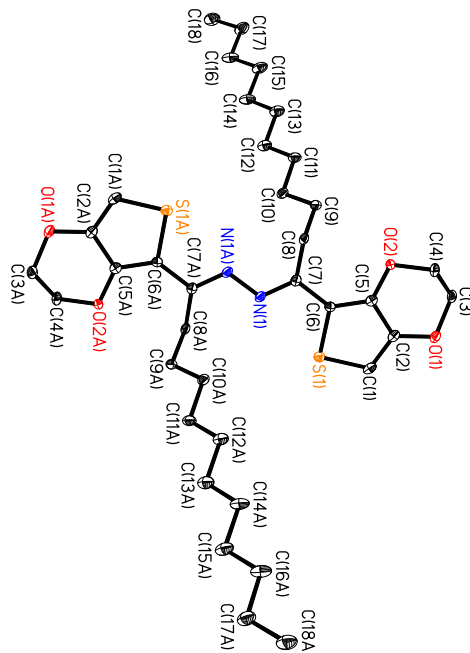

**Figure S5.** Single crystal structure of (*E,E*) isomer (**2a**) of azine molecule

**Table S1.** Crystal data and structure refinement for molecule **2a**

|                        |                                                                              |                  |
|------------------------|------------------------------------------------------------------------------|------------------|
| Identification code    | p21c                                                                         |                  |
| Empirical formula      | C <sub>36</sub> H <sub>56</sub> N <sub>2</sub> O <sub>4</sub> S <sub>2</sub> |                  |
| Formula weight         | 644.95                                                                       |                  |
| Temperature            | 100(2) K                                                                     |                  |
| Wavelength             | 0.71073 Å                                                                    |                  |
| Crystal system         | Monoclinic                                                                   |                  |
| Space group            | P2(1)/c                                                                      |                  |
| Unit cell dimensions   | a = 14.9983(12) Å                                                            | α = 90°.         |
|                        | b = 8.7827(6) Å                                                              | β = 111.777(3)°. |
|                        | c = 14.3552(12) Å                                                            | γ = 90°.         |
| Volume                 | 1756.0(2) Å <sup>3</sup>                                                     |                  |
| Z                      | 2                                                                            |                  |
| Density (calculated)   | 1.220 Mg/m <sup>3</sup>                                                      |                  |
| Absorption coefficient | 0.192 mm <sup>-1</sup>                                                       |                  |
| F(000)                 | 700                                                                          |                  |
| Crystal size           | 0.20 x 0.10 x 0.02 mm <sup>3</sup>                                           |                  |

|                                   |                                             |
|-----------------------------------|---------------------------------------------|
| Theta range for data collection   | 2.74 to 24.71°.                             |
| Index ranges                      | -17<=h<=17, -9<=k<=10, -16<=l<=16           |
| Reflections collected             | 29585                                       |
| Independent reflections           | 3001 [R(int) = 0.1095]                      |
| Completeness to theta = 24.71°    | 100.0 %                                     |
| Absorption correction             | Empirical                                   |
| Max. and min. transmission        | 0.9962 and 0.9627                           |
| Refinement method                 | Full-matrix least-squares on F <sup>2</sup> |
| Data / restraints / parameters    | 3001 / 0 / 199                              |
| Goodness-of-fit on F <sup>2</sup> | 1.046                                       |
| Final R indices [I>2sigma(I)]     | R1 = 0.0420, wR2 = 0.0862                   |
| R indices (all data)              | R1 = 0.0647, wR2 = 0.0951                   |
| Largest diff. peak and hole       | 0.271 and -0.354 e.Å <sup>-3</sup>          |

**Table S2.** Atomic coordinates ( x 10<sup>4</sup>) and equivalent isotropic displacement parameters (Å<sup>2</sup>x 10<sup>3</sup>) for molecule **2a**. U(eq) is defined as one third of the trace of the orthogonalized U<sup>ij</sup> tensor.

|       | x       | y       | z       | U(eq) |
|-------|---------|---------|---------|-------|
| S(1)  | 3692(1) | 6731(1) | 104(1)  | 13(1) |
| O(1)  | 4741(1) | 3191(2) | 1762(1) | 15(1) |
| O(2)  | 6181(1) | 5549(2) | 2066(1) | 13(1) |
| N(1)  | 4799(1) | 9298(2) | 26(1)   | 13(1) |
| C(1)  | 3673(2) | 4954(2) | 595(2)  | 15(1) |
| C(2)  | 4551(2) | 4552(2) | 1259(2) | 12(1) |
| C(3)  | 5760(2) | 2914(2) | 2218(2) | 14(1) |
| C(4)  | 6267(2) | 4312(2) | 2762(2) | 17(1) |
| C(5)  | 5259(2) | 5711(2) | 1401(2) | 11(1) |
| C(6)  | 4911(1) | 6971(2) | 815(2)  | 11(1) |
| C(7)  | 5351(1) | 8418(2) | 741(2)  | 12(1) |
| C(8)  | 6332(2) | 8809(2) | 1499(2) | 12(1) |
| C(9)  | 7186(2) | 8121(2) | 1291(2) | 14(1) |
| C(10) | 7328(2) | 8730(2) | 362(2)  | 15(1) |
| C(11) | 8267(2) | 8157(2) | 294(2)  | 16(1) |

|       |          |         |          |       |
|-------|----------|---------|----------|-------|
| C(12) | 8451(2)  | 8699(3) | -624(2)  | 19(1) |
| C(13) | 9399(2)  | 8129(3) | -665(2)  | 20(1) |
| C(14) | 9600(2)  | 8726(3) | -1562(2) | 22(1) |
| C(15) | 10524(2) | 8112(3) | -1645(2) | 22(1) |
| C(16) | 10704(2) | 8754(3) | -2543(2) | 23(1) |
| C(17) | 11600(2) | 8134(3) | -2675(2) | 25(1) |
| C(18) | 11766(2) | 8849(3) | -3563(2) | 27(1) |

---

**Table S3.** Bond lengths [ $\text{\AA}$ ] and angles [ $^\circ$ ] for molecule 2a.

---

|             |          |
|-------------|----------|
| S(1)-C(1)   | 1.717(2) |
| S(1)-C(6)   | 1.745(2) |
| O(1)-C(2)   | 1.370(2) |
| O(1)-C(3)   | 1.443(2) |
| O(2)-C(5)   | 1.364(2) |
| O(2)-C(4)   | 1.449(2) |
| N(1)-C(7)   | 1.306(3) |
| N(1)-N(1)#1 | 1.387(3) |
| C(1)-C(2)   | 1.355(3) |
| C(2)-C(5)   | 1.431(3) |
| C(3)-C(4)   | 1.501(3) |
| C(5)-C(6)   | 1.371(3) |
| C(6)-C(7)   | 1.453(3) |
| C(7)-C(8)   | 1.510(3) |
| C(8)-C(9)   | 1.541(3) |
| C(9)-C(10)  | 1.524(3) |
| C(10)-C(11) | 1.532(3) |
| C(11)-C(12) | 1.520(3) |
| C(12)-C(13) | 1.529(3) |
| C(13)-C(14) | 1.521(3) |
| C(14)-C(15) | 1.531(3) |
| C(15)-C(16) | 1.520(3) |
| C(16)-C(17) | 1.525(3) |
| C(17)-C(18) | 1.522(3) |

|                   |            |
|-------------------|------------|
| C(1)-S(1)-C(6)    | 92.48(10)  |
| C(2)-O(1)-C(3)    | 111.40(15) |
| C(5)-O(2)-C(4)    | 111.61(15) |
| C(7)-N(1)-N(1)#1  | 114.0(2)   |
| C(2)-C(1)-S(1)    | 111.48(16) |
| C(1)-C(2)-O(1)    | 123.78(18) |
| C(1)-C(2)-C(5)    | 113.05(19) |
| O(1)-C(2)-C(5)    | 123.16(19) |
| O(1)-C(3)-C(4)    | 110.18(17) |
| O(2)-C(4)-C(3)    | 110.89(17) |
| O(2)-C(5)-C(6)    | 124.73(18) |
| O(2)-C(5)-C(2)    | 122.12(18) |
| C(6)-C(5)-C(2)    | 113.15(19) |
| C(5)-C(6)-C(7)    | 132.09(19) |
| C(5)-C(6)-S(1)    | 109.82(15) |
| C(7)-C(6)-S(1)    | 117.97(15) |
| N(1)-C(7)-C(6)    | 113.69(18) |
| N(1)-C(7)-C(8)    | 126.57(18) |
| C(6)-C(7)-C(8)    | 119.62(18) |
| C(7)-C(8)-C(9)    | 115.41(17) |
| C(10)-C(9)-C(8)   | 115.34(17) |
| C(9)-C(10)-C(11)  | 111.77(18) |
| C(12)-C(11)-C(10) | 114.74(18) |
| C(11)-C(12)-C(13) | 113.63(19) |
| C(14)-C(13)-C(12) | 113.51(19) |
| C(13)-C(14)-C(15) | 114.5(2)   |
| C(16)-C(15)-C(14) | 112.7(2)   |
| C(15)-C(16)-C(17) | 114.5(2)   |
| C(18)-C(17)-C(16) | 112.4(2)   |

---

Symmetry transformations used to generate equivalent atoms:

#1 -x+1,-y+2,-z

**Table S4.** Anisotropic displacement parameters ( $\text{\AA}^2 \times 10^3$ ) for molecule **2a**. The anisotropic displacement factor exponent takes the form:  $-2\pi^2 [ h^2 a^* 2U^{11} + \dots + 2 h k a^* b^* U^{12} ]$

|       | U <sup>11</sup> | U <sup>22</sup> | U <sup>33</sup> | U <sup>23</sup> | U <sup>13</sup> | U <sup>12</sup> |
|-------|-----------------|-----------------|-----------------|-----------------|-----------------|-----------------|
| S(1)  | 12(1)           | 15(1)           | 13(1)           | 0(1)            | 5(1)            | -1(1)           |
| O(1)  | 18(1)           | 11(1)           | 19(1)           | 1(1)            | 9(1)            | -2(1)           |
| O(2)  | 11(1)           | 12(1)           | 16(1)           | 5(1)            | 3(1)            | 1(1)            |
| N(1)  | 14(1)           | 11(1)           | 19(1)           | 1(1)            | 10(1)           | -1(1)           |
| C(1)  | 17(1)           | 13(1)           | 18(1)           | -4(1)           | 11(1)           | -5(1)           |
| C(2)  | 17(1)           | 11(1)           | 12(1)           | -4(1)           | 10(1)           | -2(1)           |
| C(3)  | 18(1)           | 15(1)           | 13(1)           | 5(1)            | 9(1)            | 2(1)            |
| C(4)  | 20(1)           | 15(1)           | 15(1)           | 6(1)            | 6(1)            | 0(1)            |
| C(5)  | 14(1)           | 12(1)           | 9(1)            | -4(1)           | 8(1)            | -1(1)           |
| C(6)  | 11(1)           | 12(1)           | 10(1)           | -1(1)           | 5(1)            | 0(1)            |
| C(7)  | 15(1)           | 11(1)           | 13(1)           | 0(1)            | 11(1)           | 2(1)            |
| C(8)  | 15(1)           | 8(1)            | 15(1)           | 0(1)            | 7(1)            | -1(1)           |
| C(9)  | 10(1)           | 13(1)           | 18(1)           | 1(1)            | 5(1)            | 0(1)            |
| C(10) | 14(1)           | 11(1)           | 21(1)           | -1(1)           | 8(1)            | -2(1)           |
| C(11) | 11(1)           | 16(1)           | 22(1)           | -2(1)           | 7(1)            | -1(1)           |
| C(12) | 15(1)           | 21(1)           | 23(1)           | -3(1)           | 9(1)            | -3(1)           |
| C(13) | 16(1)           | 19(1)           | 28(1)           | -6(1)           | 11(1)           | -3(1)           |
| C(14) | 14(1)           | 29(1)           | 25(1)           | -7(1)           | 10(1)           | -5(1)           |
| C(15) | 19(1)           | 23(1)           | 30(1)           | -7(1)           | 15(1)           | -5(1)           |
| C(16) | 15(1)           | 31(1)           | 26(1)           | -10(1)          | 10(1)           | -6(1)           |
| C(17) | 24(1)           | 22(1)           | 37(2)           | -3(1)           | 20(1)           | -3(1)           |
| C(18) | 22(1)           | 31(1)           | 34(2)           | -4(1)           | 18(1)           | -2(1)           |



**Table S5.** Hydrogen coordinates ( $\times 10^4$ ) and isotropic displacement parameters ( $\text{\AA}^2 \times 10^3$ ) formolecule **2a**.

|        | x     | y    | z     | U(eq) |
|--------|-------|------|-------|-------|
| H(1)   | 3117  | 4330 | 422   | 18    |
| H(3A)  | 6013  | 2634 | 1694  | 17    |
| H(3B)  | 5882  | 2054 | 2696  | 17    |
| H(4A)  | 5986  | 4626 | 3257  | 20    |
| H(4B)  | 6954  | 4077 | 3130  | 20    |
| H(8A)  | 6368  | 8461 | 2168  | 15    |
| H(8B)  | 6402  | 9931 | 1528  | 15    |
| H(9A)  | 7780  | 8312 | 1882  | 17    |
| H(9B)  | 7096  | 7005 | 1221  | 17    |
| H(10A) | 7335  | 9857 | 381   | 18    |
| H(10B) | 6782  | 8407 | -244  | 18    |
| H(11A) | 8808  | 8492 | 902   | 19    |
| H(11B) | 8260  | 7030 | 295   | 19    |
| H(12A) | 8452  | 9827 | -631  | 23    |
| H(12B) | 7917  | 8351 | -1234 | 23    |
| H(13A) | 9930  | 8440 | -42   | 24    |
| H(13B) | 9387  | 7002 | -688  | 24    |
| H(14A) | 9640  | 9850 | -1521 | 26    |
| H(14B) | 9052  | 8458 | -2182 | 26    |
| H(15A) | 11074 | 8370 | -1025 | 27    |
| H(15B) | 10483 | 6989 | -1701 | 27    |
| H(16A) | 10761 | 9875 | -2474 | 28    |
| H(16B) | 10139 | 8529 | -3158 | 28    |
| H(17A) | 12165 | 8331 | -2056 | 30    |
| H(17B) | 11536 | 7018 | -2772 | 30    |
| H(18A) | 12347 | 8417 | -3617 | 41    |
| H(18B) | 11843 | 9952 | -3463 | 41    |
| H(18C) | 11214 | 8639 | -4180 | 41    |

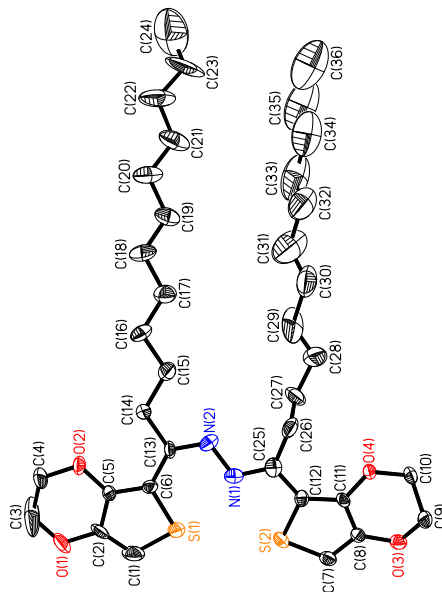

**Figure S6.** Single crystal structure of (*E,Z*) isomer (**2b**) of azine molecule

**Table S6.** Crystal data and structure refinement for molecule **2b**.

|                        |                                                                              |                    |
|------------------------|------------------------------------------------------------------------------|--------------------|
| Identification code    | p21c                                                                         |                    |
| Empirical formula      | C <sub>36</sub> H <sub>56</sub> N <sub>2</sub> O <sub>4</sub> S <sub>2</sub> |                    |
| Formula weight         | 644.95                                                                       |                    |
| Temperature            | 100(2) K                                                                     |                    |
| Wavelength             | 0.71073 Å                                                                    |                    |
| Crystal system         | Monoclinic                                                                   |                    |
| Space group            | P2(1)/c                                                                      |                    |
| Unit cell dimensions   | a = 25.7143(12) Å                                                            | α = 90°.           |
|                        | b = 7.7086(3) Å                                                              | β = 107.4390(10)°. |
|                        | c = 18.8672(8) Å                                                             | γ = 90°.           |
| Volume                 | 3568.0(3) Å <sup>3</sup>                                                     |                    |
| Z                      | 4                                                                            |                    |
| Density (calculated)   | 1.201 Mg/m <sup>3</sup>                                                      |                    |
| Absorption coefficient | 0.189 mm <sup>-1</sup>                                                       |                    |
| F(000)                 | 1400                                                                         |                    |

|                                   |                                             |
|-----------------------------------|---------------------------------------------|
| Crystal size                      | 0.40 x 0.30 x 0.02 mm <sup>3</sup>          |
| Theta range for data collection   | 1.66 to 20.81°.                             |
| Index ranges                      | -25<=h<=25, -7<=k<=7, -18<=l<=18            |
| Reflections collected             | 25257                                       |
| Independent reflections           | 3739 [R(int) = 0.0635]                      |
| Completeness to theta = 20.81°    | 100.0 %                                     |
| Absorption correction             | Empirical                                   |
| Max. and min. transmission        | 0.9962 and 0.9284                           |
| Refinement method                 | Full-matrix least-squares on F <sup>2</sup> |
| Data / restraints / parameters    | 3739 / 127 / 397                            |
| Goodness-of-fit on F <sup>2</sup> | 1.038                                       |
| Final R indices [I>2sigma(I)]     | R1 = 0.0916, wR2 = 0.2062                   |
| R indices (all data)              | R1 = 0.1091, wR2 = 0.2208                   |
| Largest diff. peak and hole       | 0.692 and -0.806 e.Å <sup>-3</sup>          |

**Table S7.** Atomic coordinates ( x 10<sup>4</sup>) and equivalent isotropic displacement parameters (Å<sup>2</sup>x 10<sup>3</sup>)for molecule **2b**. U(eq) is defined as one third of the trace of the orthogonalized U<sup>ij</sup> tensor.

|      | x       | y         | z        | U(eq)  |
|------|---------|-----------|----------|--------|
| S(1) | 880(1)  | 753(3)    | -4436(1) | 40(1)  |
| C(1) | 734(3)  | -832(11)  | -5091(4) | 54(2)  |
| C(2) | 1088(3) | -2164(10) | -4922(3) | 37(2)  |
| O(1) | 1071(2) | -3597(7)  | -5355(3) | 52(2)  |
| C(3) | 1507(4) | -4685(16) | -5093(7) | 136(7) |
| C(4) | 1852(5) | -4574(11) | -4395(4) | 80(4)  |
| O(2) | 1903(2) | -3080(5)  | -3956(2) | 33(1)  |

|       |         |           |          |        |
|-------|---------|-----------|----------|--------|
| C(5)  | 1494(2) | -1907(8)  | -4230(3) | 26(2)  |
| C(6)  | 1445(2) | -382(8)   | -3880(3) | 26(2)  |
| C(13) | 1782(3) | 234(8)    | -3159(3) | 28(2)  |
| C(14) | 2249(3) | -906(9)   | -2704(3) | 37(2)  |
| C(15) | 2464(3) | -448(10)  | -1891(4) | 41(2)  |
| C(16) | 2935(3) | -1555(10) | -1438(4) | 43(2)  |
| C(17) | 3119(3) | -1112(11) | -639(4)  | 50(2)  |
| C(18) | 3577(3) | -2143(12) | -118(4)  | 55(2)  |
| C(19) | 3699(3) | -1764(11) | 671(4)   | 51(2)  |
| C(20) | 4140(3) | -2726(12) | 1220(4)  | 63(3)  |
| C(21) | 4222(4) | -2321(13) | 2019(4)  | 74(3)  |
| C(22) | 4647(5) | -3245(14) | 2601(5)  | 108(5) |
| C(23) | 4684(7) | -2826(18) | 3397(6)  | 169(8) |
| C(24) | 4976(9) | -3750(20) | 3947(9)  | 189(9) |
| S(2)  | 351(1)  | 4626(2)   | -3956(1) | 31(1)  |
| C(7)  | -24(3)  | 6459(9)   | -3978(3) | 30(2)  |
| C(8)  | 212(3)  | 7551(8)   | -3417(3) | 25(2)  |
| O(3)  | -14(2)  | 9081(6)   | -3282(2) | 31(1)  |
| C(9)  | 383(3)  | 10174(9)  | -2791(3) | 32(2)  |
| C(10) | 719(3)  | 9208(8)   | -2137(3) | 31(2)  |
| O(4)  | 1024(2) | 7835(5)   | -2348(2) | 28(1)  |
| C(11) | 723(2)  | 6915(8)   | -2944(3) | 22(2)  |
| C(12) | 854(2)  | 5346(8)   | -3162(3) | 25(2)  |
| C(25) | 1318(3) | 4213(9)   | -2840(4) | 32(2)  |
| C(26) | 1723(3) | 4704(9)   | -2119(4) | 43(2)  |
| C(27) | 1569(4) | 4044(11)  | -1461(4) | 75(3)  |
| C(28) | 1909(6) | 4567(13)  | -708(5)  | 123(5) |
| C(29) | 2370(4) | 3680(14)  | -368(7)  | 129(5) |
| C(30) | 2735(4) | 3929(13)  | 416(6)   | 101(4) |

|       |         |          |          |        |
|-------|---------|----------|----------|--------|
| C(31) | 2993(7) | 2869(17) | 924(9)   | 237(9) |
| C(32) | 3388(5) | 3146(15) | 1661(7)  | 128(5) |
| C(33) | 3310(6) | 2061(18) | 2260(9)  | 152(5) |
| C(34) | 3754(6) | 2357(17) | 2975(8)  | 133(4) |
| C(35) | 3746(8) | 1380(30) | 3649(11) | 181(7) |
| C(36) | 4168(8) | 1570(20) | 4286(10) | 179(7) |
| N(1)  | 1328(2) | 2756(8)  | -3206(3) | 32(2)  |
| N(2)  | 1756(2) | 1687(8)  | -2820(3) | 34(2)  |

---

**Table S8.** Bond lengths [ $\text{\AA}$ ] and angles [ $^\circ$ ] for molecule **2b**.

---

|             |           |
|-------------|-----------|
| S(1)-C(1)   | 1.698(8)  |
| S(1)-C(6)   | 1.749(6)  |
| C(1)-C(2)   | 1.346(9)  |
| C(2)-O(1)   | 1.367(8)  |
| C(2)-C(5)   | 1.420(9)  |
| O(1)-C(3)   | 1.370(10) |
| C(3)-C(4)   | 1.352(11) |
| C(4)-O(2)   | 1.401(9)  |
| O(2)-C(5)   | 1.366(7)  |
| C(5)-C(6)   | 1.371(8)  |
| C(6)-C(13)  | 1.457(8)  |
| C(13)-N(2)  | 1.301(8)  |
| C(13)-C(14) | 1.528(9)  |
| C(14)-C(15) | 1.508(9)  |
| C(15)-C(16) | 1.517(9)  |
| C(16)-C(17) | 1.478(9)  |
| C(17)-C(18) | 1.513(10) |

|             |           |
|-------------|-----------|
| C(18)-C(19) | 1.456(10) |
| C(19)-C(20) | 1.485(10) |
| C(20)-C(21) | 1.492(11) |
| C(21)-C(22) | 1.481(11) |
| C(22)-C(23) | 1.510(15) |
| C(23)-C(24) | 1.300(16) |
| S(2)-C(7)   | 1.704(7)  |
| S(2)-C(12)  | 1.750(6)  |
| C(7)-C(8)   | 1.346(8)  |
| C(8)-O(3)   | 1.372(7)  |
| C(8)-C(11)  | 1.434(8)  |
| O(3)-C(9)   | 1.428(7)  |
| C(9)-C(10)  | 1.478(8)  |
| C(10)-O(4)  | 1.443(7)  |
| O(4)-C(11)  | 1.358(7)  |
| C(11)-C(12) | 1.353(8)  |
| C(12)-C(25) | 1.457(9)  |
| C(25)-N(1)  | 1.323(9)  |
| C(25)-C(26) | 1.493(9)  |
| C(26)-C(27) | 1.500(10) |
| C(27)-C(28) | 1.483(11) |
| C(28)-C(29) | 1.352(12) |
| C(29)-C(30) | 1.508(12) |
| C(30)-C(31) | 1.283(13) |
| C(31)-C(32) | 1.471(13) |
| C(32)-C(33) | 1.469(15) |
| C(33)-C(34) | 1.500(15) |
| C(34)-C(35) | 1.485(16) |
| C(35)-C(36) | 1.364(18) |

|                   |           |
|-------------------|-----------|
| N(1)-N(2)         | 1.392(8)  |
| C(1)-S(1)-C(6)    | 92.2(3)   |
| C(2)-C(1)-S(1)    | 112.9(5)  |
| C(1)-C(2)-O(1)    | 125.1(6)  |
| C(1)-C(2)-C(5)    | 111.7(6)  |
| O(1)-C(2)-C(5)    | 123.2(6)  |
| C(2)-O(1)-C(3)    | 113.7(6)  |
| C(4)-C(3)-O(1)    | 122.7(8)  |
| C(3)-C(4)-O(2)    | 123.1(8)  |
| C(5)-O(2)-C(4)    | 113.4(6)  |
| O(2)-C(5)-C(6)    | 123.9(5)  |
| O(2)-C(5)-C(2)    | 121.6(6)  |
| C(6)-C(5)-C(2)    | 114.5(6)  |
| C(5)-C(6)-C(13)   | 127.8(6)  |
| C(5)-C(6)-S(1)    | 108.6(4)  |
| C(13)-C(6)-S(1)   | 123.5(5)  |
| N(2)-C(13)-C(6)   | 129.5(6)  |
| N(2)-C(13)-C(14)  | 111.5(5)  |
| C(6)-C(13)-C(14)  | 119.0(5)  |
| C(15)-C(14)-C(13) | 115.1(5)  |
| C(14)-C(15)-C(16) | 115.4(6)  |
| C(17)-C(16)-C(15) | 113.7(6)  |
| C(16)-C(17)-C(18) | 119.3(7)  |
| C(19)-C(18)-C(17) | 116.5(7)  |
| C(18)-C(19)-C(20) | 119.9(7)  |
| C(19)-C(20)-C(21) | 116.6(8)  |
| C(22)-C(21)-C(20) | 119.9(9)  |
| C(21)-C(22)-C(23) | 116.5(11) |

|                   |           |
|-------------------|-----------|
| C(24)-C(23)-C(22) | 121.7(14) |
| C(7)-S(2)-C(12)   | 91.5(3)   |
| C(8)-C(7)-S(2)    | 112.4(5)  |
| C(7)-C(8)-O(3)    | 124.6(6)  |
| C(7)-C(8)-C(11)   | 112.9(5)  |
| O(3)-C(8)-C(11)   | 122.5(5)  |
| C(8)-O(3)-C(9)    | 111.5(5)  |
| O(3)-C(9)-C(10)   | 111.7(5)  |
| O(4)-C(10)-C(9)   | 111.7(5)  |
| C(11)-O(4)-C(10)  | 112.9(4)  |
| C(12)-C(11)-O(4)  | 125.9(5)  |
| C(12)-C(11)-C(8)  | 112.4(5)  |
| O(4)-C(11)-C(8)   | 121.7(5)  |
| C(11)-C(12)-C(25) | 131.1(6)  |
| C(11)-C(12)-S(2)  | 110.9(5)  |
| C(25)-C(12)-S(2)  | 118.0(5)  |
| N(1)-C(25)-C(12)  | 115.7(6)  |
| N(1)-C(25)-C(26)  | 125.0(6)  |
| C(12)-C(25)-C(26) | 119.2(6)  |
| C(25)-C(26)-C(27) | 112.5(6)  |
| C(28)-C(27)-C(26) | 118.3(9)  |
| C(29)-C(28)-C(27) | 119.9(10) |
| C(28)-C(29)-C(30) | 127.0(10) |
| C(31)-C(30)-C(29) | 133.0(10) |
| C(30)-C(31)-C(32) | 132.0(12) |
| C(33)-C(32)-C(31) | 115.4(12) |
| C(32)-C(33)-C(34) | 111.2(10) |
| C(35)-C(34)-C(33) | 119.4(13) |
| C(36)-C(35)-C(34) | 119.2(17) |



|                 |          |
|-----------------|----------|
| C(25)-N(1)-N(2) | 111.4(5) |
| C(13)-N(2)-N(1) | 113.7(5) |

---

Symmetry transformations used to generate equivalent atoms:

**Table S9.** Anisotropic displacement parameters ( $\text{\AA}^2 \times 10^3$ ) for molecule **2b**. The anisotropic displacement factor exponent takes the form:  $-2\pi^2 [ h^2 a^*^2 U^{11} + \dots + 2 h k a^* b^* U^{12} ]$

---

|       | U <sup>11</sup> | U <sup>22</sup> | U <sup>33</sup> | U <sup>23</sup> | U <sup>13</sup> | U <sup>12</sup> |
|-------|-----------------|-----------------|-----------------|-----------------|-----------------|-----------------|
| S(1)  | 45(1)           | 49(1)           | 27(1)           | 5(1)            | 11(1)           | 21(1)           |
| C(1)  | 41(5)           | 87(7)           | 26(4)           | 4(4)            | 0(4)            | 24(5)           |
| C(2)  | 42(5)           | 55(5)           | 15(4)           | -8(4)           | 9(4)            | 3(4)            |
| O(1)  | 59(4)           | 62(4)           | 30(3)           | -23(3)          | 9(3)            | 7(3)            |
| C(3)  | 59(7)           | 143(12)         | 161(13)         | -128(10)        | -37(7)          | 47(8)           |
| C(4)  | 153(10)         | 44(6)           | 43(5)           | -4(5)           | 27(6)           | 49(6)           |
| O(2)  | 36(3)           | 22(3)           | 39(3)           | -10(2)          | 7(2)            | 6(2)            |
| C(5)  | 28(4)           | 30(4)           | 23(4)           | 1(3)            | 15(3)           | 8(3)            |
| C(6)  | 31(4)           | 30(4)           | 21(4)           | 8(3)            | 11(3)           | 8(3)            |
| C(13) | 44(4)           | 15(4)           | 28(4)           | -3(3)           | 17(4)           | 4(3)            |
| C(14) | 53(5)           | 30(4)           | 24(4)           | -1(3)           | 5(4)            | 14(4)           |
| C(15) | 38(4)           | 35(5)           | 43(5)           | -3(4)           | 3(4)            | 7(4)            |
| C(16) | 29(4)           | 46(5)           | 46(5)           | 10(4)           | -1(4)           | 11(4)           |
| C(17) | 44(5)           | 52(5)           | 44(5)           | 0(4)            | -2(4)           | 1(4)            |
| C(18) | 30(4)           | 75(6)           | 49(5)           | 12(5)           | -5(4)           | 4(4)            |
| C(19) | 49(5)           | 59(6)           | 38(5)           | -4(4)           | 1(4)            | -17(4)          |
| C(20) | 52(5)           | 71(7)           | 50(6)           | 17(5)           | -11(4)          | -9(5)           |
| C(21) | 92(7)           | 70(7)           | 43(6)           | -3(5)           | -6(5)           | -37(6)          |
| C(22) | 127(10)         | 69(7)           | 74(8)           | 31(6)           | -51(7)          | -21(7)          |

|       |         |         |         |         |          |         |
|-------|---------|---------|---------|---------|----------|---------|
| C(23) | 270(20) | 103(11) | 47(7)   | -3(7)   | -81(10)  | -20(12) |
| C(24) | 330(30) | 135(15) | 141(15) | 13(13)  | 127(18)  | 17(17)  |
| S(2)  | 37(1)   | 34(1)   | 22(1)   | -7(1)   | 9(1)     | -2(1)   |
| C(7)  | 30(4)   | 39(4)   | 21(4)   | 0(4)    | 8(3)     | 5(3)    |
| C(8)  | 33(4)   | 27(4)   | 20(4)   | 1(3)    | 17(3)    | 5(4)    |
| O(3)  | 29(3)   | 40(3)   | 24(3)   | 0(2)    | 8(2)     | 10(2)   |
| C(9)  | 42(4)   | 28(4)   | 30(4)   | -3(4)   | 17(4)    | 8(4)    |
| C(10) | 40(4)   | 27(4)   | 27(4)   | -8(3)   | 12(3)    | 1(3)    |
| O(4)  | 31(3)   | 23(3)   | 25(3)   | -7(2)   | 0(2)     | 6(2)    |
| C(11) | 28(4)   | 25(4)   | 18(4)   | -3(3)   | 13(3)    | 0(3)    |
| C(12) | 22(4)   | 24(4)   | 29(4)   | -3(3)   | 10(3)    | 1(3)    |
| C(25) | 31(4)   | 28(4)   | 39(4)   | -2(4)   | 14(4)    | -7(4)   |
| C(26) | 34(4)   | 28(4)   | 56(5)   | -2(4)   | 0(4)     | 12(4)   |
| C(27) | 148(9)  | 40(5)   | 24(4)   | -6(4)   | 6(4)     | 1(6)    |
| C(28) | 205(12) | 50(6)   | 62(5)   | -2(5)   | -39(7)   | 29(7)   |
| C(29) | 52(6)   | 79(8)   | 197(10) | -91(8)  | -51(7)   | 2(5)    |
| C(30) | 81(7)   | 56(7)   | 142(9)  | -36(6)  | -5(6)    | 16(6)   |
| C(31) | 203(15) | 63(8)   | 291(13) | -43(9)  | -158(12) | 0(10)   |
| C(32) | 76(8)   | 56(7)   | 199(10) | -22(7)  | -36(7)   | -11(6)  |
| C(33) | 98(10)  | 66(9)   | 301(13) | -12(10) | 74(9)    | -16(8)  |
| C(34) | 144(11) | 78(9)   | 216(11) | 9(9)    | 112(8)   | -18(9)  |
| C(35) | 191(18) | 105(12) | 303(16) | 62(15)  | 160(12)  | 19(14)  |
| C(36) | 210(20) | 107(13) | 266(16) | 86(17)  | 147(13)  | 19(15)  |
| N(1)  | 30(3)   | 37(4)   | 26(3)   | 4(3)    | 3(3)     | -1(3)   |
| N(2)  | 28(3)   | 32(4)   | 38(4)   | 9(3)    | 3(3)     | 5(3)    |

---

**Table S10.** Hydrogen coordinates ( $\times 10^4$ ) and isotropic displacement parameters ( $\text{\AA}^2 \times 10^3$ ) for molecule **2b**.

|        | x    | y     | z     | U(eq) |
|--------|------|-------|-------|-------|
| H(1)   | 434  | -784  | -5531 | 64    |
| H(3A)  | 1361 | -5882 | -5153 | 164   |
| H(3B)  | 1732 | -4571 | -5433 | 164   |
| H(4A)  | 2220 | -4837 | -4429 | 97    |
| H(4B)  | 1755 | -5532 | -4109 | 97    |
| H(14A) | 2123 | -2126 | -2747 | 45    |
| H(14B) | 2553 | -831  | -2924 | 45    |
| H(15A) | 2162 | -542  | -1670 | 49    |
| H(15B) | 2584 | 778   | -1849 | 49    |
| H(16A) | 2822 | -2788 | -1492 | 52    |
| H(16B) | 3245 | -1423 | -1641 | 52    |
| H(17A) | 2799 | -1200 | -452  | 60    |
| H(17B) | 3232 | 122   | -597  | 60    |
| H(18A) | 3485 | -3390 | -194  | 66    |
| H(18B) | 3911 | -1945 | -263  | 66    |
| H(19A) | 3359 | -1944 | 806   | 62    |
| H(19B) | 3788 | -513  | 738   | 62    |
| H(20A) | 4486 | -2496 | 1110  | 76    |
| H(20B) | 4063 | -3983 | 1145  | 76    |
| H(21A) | 4300 | -1064 | 2088  | 89    |
| H(21B) | 3870 | -2524 | 2119  | 89    |
| H(22A) | 5005 | -2988 | 2528  | 129   |
| H(22B) | 4583 | -4508 | 2526  | 129   |
| H(23A) | 4817 | -1617 | 3489  | 202   |

|        |      |       |       |     |
|--------|------|-------|-------|-----|
| H(23B) | 4307 | -2831 | 3429  | 202 |
| H(24A) | 4936 | -3309 | 4414  | 283 |
| H(24B) | 5360 | -3692 | 3963  | 283 |
| H(24C) | 4854 | -4964 | 3880  | 283 |
| H(7)   | -361 | 6685  | -4345 | 36  |
| H(9A)  | 196  | 11141 | -2623 | 38  |
| H(9B)  | 623  | 10676 | -3063 | 38  |
| H(10A) | 975  | 10019 | -1799 | 37  |
| H(10B) | 479  | 8708  | -1866 | 37  |
| H(26A) | 1754 | 5984  | -2089 | 51  |
| H(26B) | 2084 | 4232  | -2102 | 51  |
| H(27A) | 1190 | 4419  | -1519 | 90  |
| H(27B) | 1567 | 2761  | -1482 | 90  |
| H(28A) | 2013 | 5796  | -737  | 148 |
| H(28B) | 1675 | 4527  | -378  | 148 |
| H(29A) | 2609 | 3822  | -689  | 154 |
| H(29B) | 2263 | 2442  | -403  | 154 |
| H(30A) | 3022 | 4730  | 361   | 122 |
| H(30B) | 2511 | 4621  | 657   | 122 |
| H(31A) | 3184 | 2084  | 669   | 284 |
| H(31B) | 2702 | 2159  | 1025  | 284 |
| H(32A) | 3759 | 2930  | 1624  | 153 |
| H(32B) | 3371 | 4379  | 1799  | 153 |
| H(33A) | 3307 | 824   | 2118  | 183 |
| H(33B) | 2953 | 2333  | 2332  | 183 |
| H(34A) | 4106 | 2107  | 2881  | 159 |
| H(34B) | 3754 | 3608  | 3094  | 159 |
| H(35A) | 3407 | 1692  | 3763  | 217 |
| H(35B) | 3721 | 129   | 3521  | 217 |

|        |      |      |      |     |
|--------|------|------|------|-----|
| H(36A) | 4102 | 858  | 4680 | 269 |
| H(36B) | 4196 | 2795 | 4438 | 269 |
| H(36C) | 4509 | 1212 | 4198 | 269 |

---

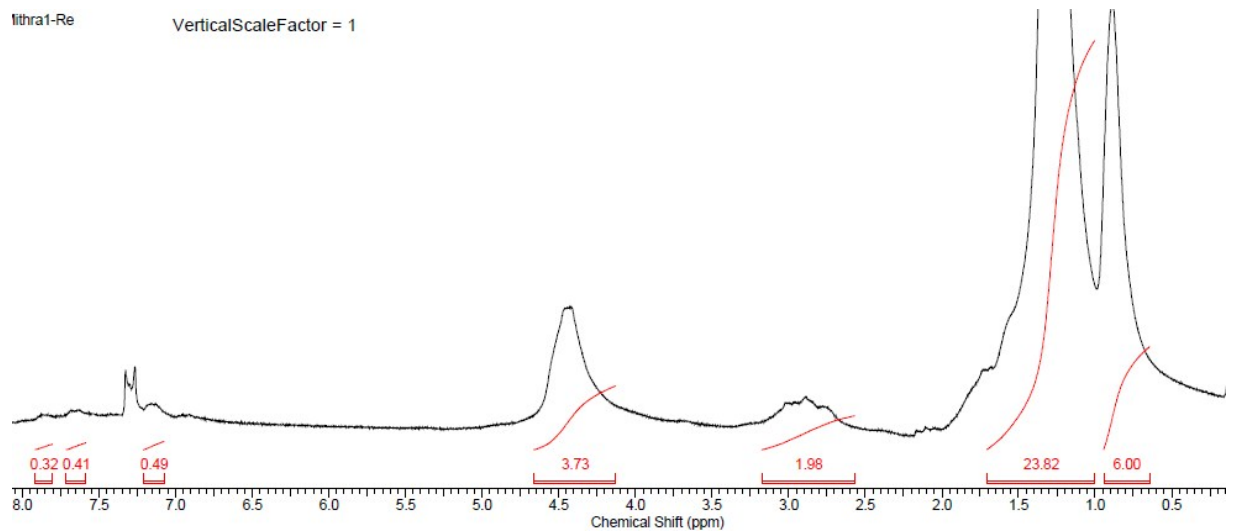

**Figure S7.**  $^1\text{H}$  NMR spectrum of the PAZ-I

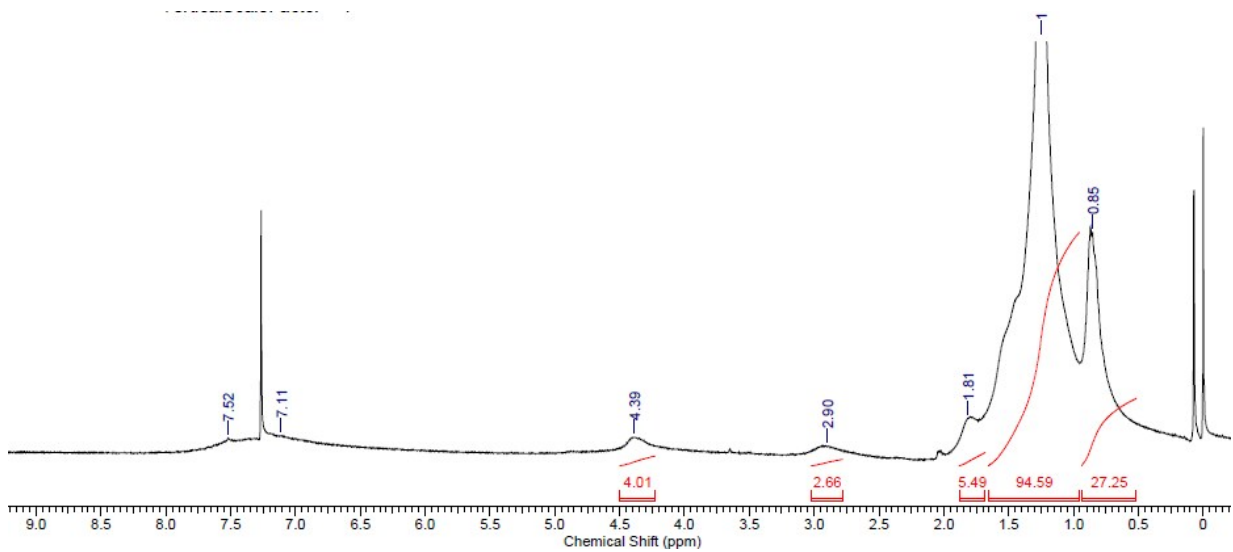

**Figure S8.**  $^1\text{H}$  NMR spectrum of the PAZ-II

**Table S11.** Molecular weights and TGA data of polyazines

|               | $M_w(D)$ | $T_d(^{\circ}C)$ |
|---------------|----------|------------------|
| <b>PAz-I</b>  | 17165    | 335              |
| <b>PAz-II</b> | 16364    | 335              |

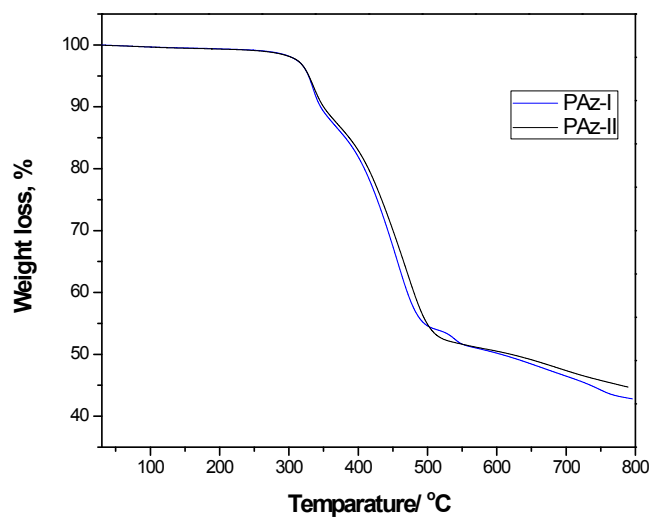

**Figure S9.** TGA diagram of the polymers **PAz-I** and **PAz-II**

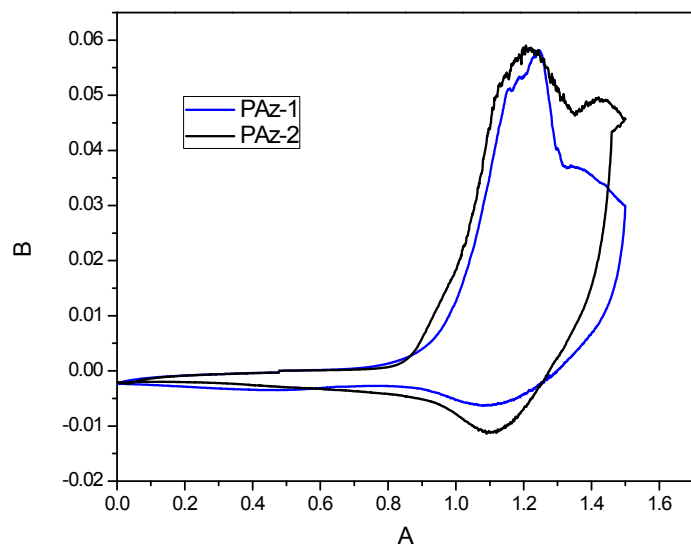

**Figure S10.** Cyclic voltammogram of polymers **PAz-I** and **PAz-II**

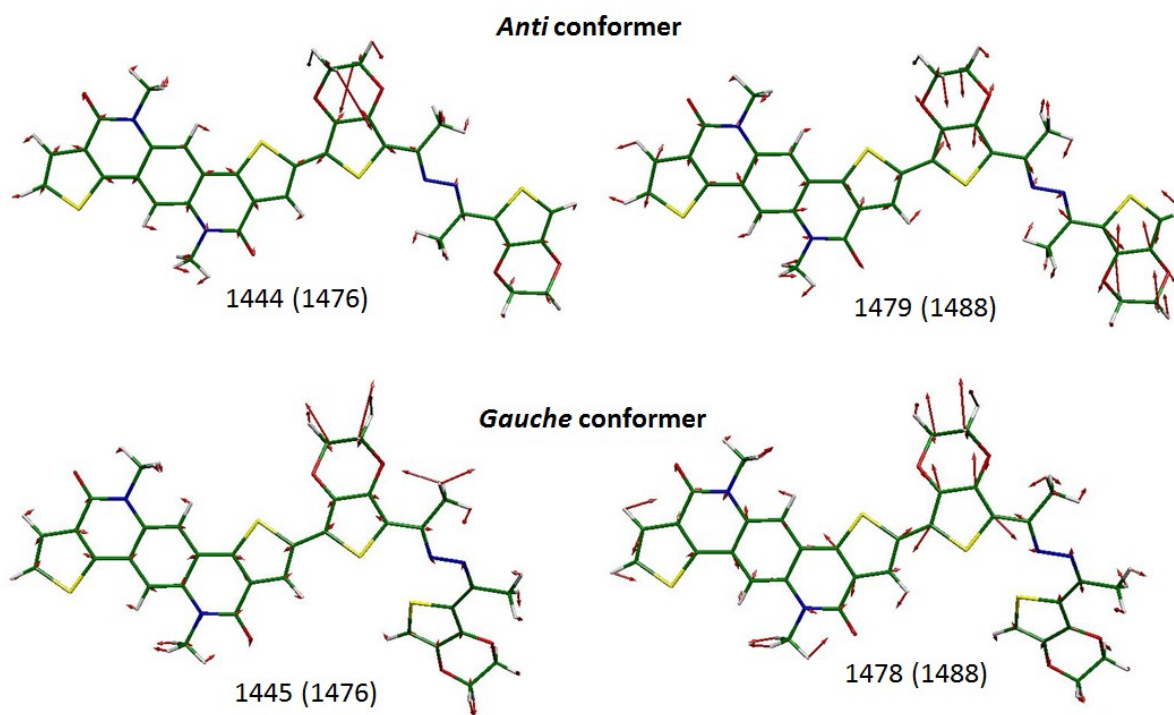

**Figure S11.** DFT/B3LYP/6-31G\*\* theoretical eigenvectors for the most intense Raman bands of **PAz-I** (*anti* conformation) and **PAz-II** (*gauche* conformation).

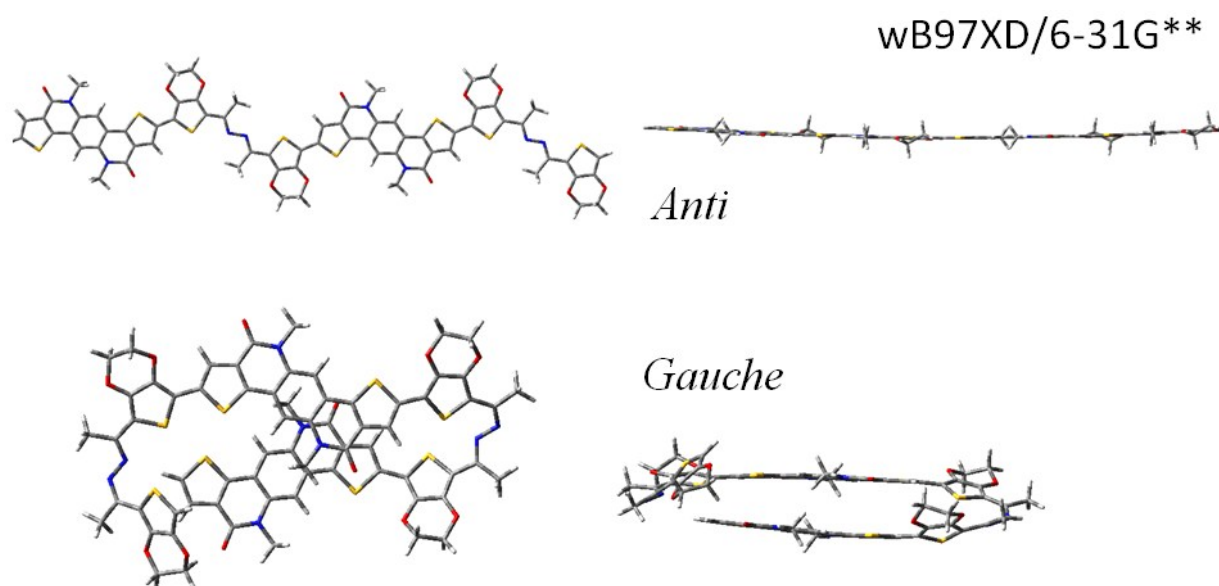

**Figure S12.** DFT/wB97XD/6-31G\*\* optimized geometries for a dimeric model of the *anti* and *gauche* conformers.



### Energy difference between *gauche* and *trans* conformation

|                |                 |              |                 |
|----------------|-----------------|--------------|-----------------|
| B3LYP/6-31G**  | <u>Molecule</u> | <i>trans</i> | <i>gauche</i>   |
|                | <u>Monomer</u>  | 0            | +2.48 kcal/mol  |
|                | <u>Dimer</u>    | 0            | +5.73 Kcal/mol  |
| wB97XD/6-31G** | <u>Molecule</u> | <i>trans</i> | <i>gauche</i>   |
|                | <u>Dimer</u>    | 0            | +19.67 kcal/mol |

### Dihedral Angles (°) in the C-C-N-N-N-CC region

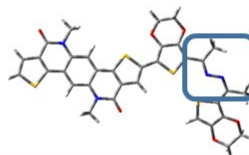

|                |                       |                    |                    |                    |
|----------------|-----------------------|--------------------|--------------------|--------------------|
| B3LYP/6-31G**  | <u>Molecule</u>       | $\theta_{C-C-N-N}$ | $\theta_{C-N-N-C}$ | $\theta_{N-N-C-C}$ |
|                | <u>Monomer-gauche</u> | -174°              | -159°              | 6°                 |
|                | <u>Dimer-gauche</u>   | -173.5°            | -158°              | 6.5°               |
|                | <u>Monomer-trans</u>  | -180°              | -179°              | 180°               |
|                | <u>Dimer-trans</u>    | -180°              | -180°              | 180°               |
| wB97XD/6-31G** | <u>Molecule</u>       | $\theta_{C-C-N-N}$ | $\theta_{C-N-N-C}$ | $\theta_{N-N-C-C}$ |
|                | <u>Dimer-gauche</u>   | -176°              | -150°/-141°        | 8°/6°              |
|                | <u>Dimer-trans</u>    | -180°              | -180°              | 180°               |

**Figure S13.** Comparison between the theoretical data (energies and dihedral angles) obtained at B3LYP/6-31G\*\* and wB97XD/6-31G\*\* levels of calculations.
